# Supplementary material
Source: PubMed Central journal article supplement (PMC6715145)
Supplement: NIHMS998723-supplement-Supp_AppendixTableS1.pdf [file NIHMS998723-supplement-Supp_AppendixTableS1.pdf]

# Web-based supporting materials for “Landmark Linear Transformation Model for Dynamic Prediction with Application to a Longitudinal Cohort Study of Chronic Disease” by

Yayuan Zhu, Liang Li, and Xuelin Huang

## Appendix A. Algorithm for Solving Estimating Equations (8) and (9) in Section 2.2.

Given a landmark time  $s$ , for  $t_{ij}$  in the neighbourhood of  $s$ , we let  $X_{ij} = X_i - t_{ij}$  be the observed residual failure times and  $0 < u_1 < \dots < u_{K_s}$  be the  $K_s$  uncensored residual failure times among  $X_{ij}$ 's. Then the resulting estimate of  $H(u; s)$  is a step function with jumps only at  $u_1, \dots, u_{K_s}$ . The iterative algorithm is summarised as follows.

**Step 1:** Suppose we have an initial value of  $\boldsymbol{\theta}(s)$  as  $\boldsymbol{\theta}_0(s)$  and denote  $\Lambda_\epsilon\{\boldsymbol{\theta}'_0(s)\tilde{\mathbf{Z}}_i^p(t_{ij} - s) + H(u_k; s)\}$  by  $\Lambda_\epsilon\{H(u_k; s)|\boldsymbol{\theta}_0(s)\}$  and let  $w_{ij}(s) = K_h(t_{ij} - s)$ . Note that  $\Lambda_\epsilon(t) = \int_{-\infty}^t \lambda_\epsilon(u)du$  is the cumulative hazard function of  $\epsilon_s$  in model (5), e.g.,  $\Lambda_\epsilon(t) = \exp(t)$  for the Cox models and  $\Lambda_\epsilon(t) = \log\{1 + \exp(t)\}$  for PO models, i.e.,  $\Lambda_\epsilon(t)$  is a known function given by the link function  $g(\cdot)$  in (4). Then,  $\hat{H}(u_k; s)$ ,  $k = 1, \dots, K_s$ , can be obtained by numerically solving the following estimating equations one by one

$$\begin{aligned} & \sum_{i=1}^n \sum_{j=1}^{m_i} w_{ij}(s)[dN_i(u_1; t_{ij}) - Y_i(u_1; t_{ij})\Lambda_\epsilon\{H(u_1; s)|\boldsymbol{\theta}_0(s)\}] = 0 \\ & \sum_{i=1}^n \sum_{j=1}^{m_i} w_{ij}(s)[dN_i(u_2; t_{ij}) - Y_i(u_2; t_{ij})(\Lambda_\epsilon\{H(u_2; s)|\boldsymbol{\theta}_0(s)\} - \Lambda_\epsilon\{H(u_1; s)|\boldsymbol{\theta}_0(s)\})] = 0 \\ & \quad \vdots \\ & \sum_{i=1}^n \sum_{j=1}^{m_i} w_{ij}(s)[dN_i(u_{K_s}; t_{ij}) - Y_i(u_{K_s}; t_{ij})(\Lambda_\epsilon\{H(u_{K_s}; s)|\boldsymbol{\theta}_0(s)\} - \Lambda_\epsilon\{H(u_{K_s-1}; s)|\boldsymbol{\theta}_0(s)\})] = 0. \end{aligned} \tag{A1}$$

**Step 2:** As we obtain  $\hat{H}(u_k; s)$ ,  $k = 1, \dots, K_s$ , from Step 1, we can estimate  $\hat{\boldsymbol{\theta}}(s)$  by solving

$$\sum_{i=1}^n \sum_{j=1}^{m_i} \sum_{k=1}^{K_s} w_{ij}(s)\tilde{\mathbf{Z}}_i^p(t_{ij} - s)[dN_i(u_k; t_{ij}) - Y_i(u_k; t_{ij})(\Lambda_\epsilon\{\hat{H}(u_k; s)|\boldsymbol{\theta}(s)\} - \Lambda_\epsilon\{\hat{H}(u_{k-1}; s)|\boldsymbol{\theta}(s)\})] = \mathbf{0}, \tag{A2}$$

where we assume  $\Lambda_\epsilon\{\widehat{H}(u_0; s)|\boldsymbol{\theta}(s)\} = 0$ .

Then, we substitute  $\boldsymbol{\theta}_0(s)$  with the new estimate of  $\widehat{\boldsymbol{\theta}}(s)$  obtained in Step 2 and repeat Steps 1 & 2 until the specified convergence criteria are met.

For computational simplicity and efficiency, this algorithm can be simplified by the following linear approximation to avoid numerically solving the equations in (A1)

$$\Lambda_\epsilon\{H(u_k; s)|\boldsymbol{\theta}_0(s)\} - \Lambda_\epsilon\{H(u_{k-1}; s)|\boldsymbol{\theta}_0(s)\} \approx \lambda_\epsilon\{H(u_{k-1}; s)|\boldsymbol{\theta}_0(s)\}\Delta H(u_k; s),$$

where  $\Delta H(u_k; s) = H(u_k; s) - H(u_{k-1}; s)$ . Details are referred to Chen et al. (2002). In addition, if a landmark PH or PO model is desired, standard software for the Cox model or proportional odds model can be employed to solve the pooled score functions at  $t_{ij}$  weighted by kernel weights  $w_{ij}(s) = K_h(t_{ij} - s)$ .

## Appendix B. General Data Generation Method for Simulations in Section 3.

Let  $\psi_i(s) = \mathbf{Z}'_i(s)\boldsymbol{\beta}(s)$  and write the landmark linear transformation model as

$$P(T_{is} > u|\psi_i(s)) = g^{-1}\{H(u; s) + \psi_i(s)\}. \quad (\text{A3})$$

First, we generate failure time  $T_i$  at baseline  $s = 0$ . Given the marginal distribution of  $\psi_i(s)$  for  $s = 0$  and the function  $H(t; 0)$ , we can generate  $T_i$  from the marginal distribution of the failure times, which we obtain by taking the expectation with respect to  $\psi_i(0)$ , i.e.,

$$P(T_i > t) = E_{\psi(0)}[g^{-1}\{H(t; 0) + \psi_i(0)\}]. \quad (\text{A4})$$

Second, it is known that for an individual who is at risk at  $s > 0$ ,  $P(T_i > s + u)/P(T_i > s) = P(T_i > s + u|T_i > s) = P(T_{is} > u)$  for all  $u \geq 0$ . Then, by (A3) and (A4), we can solve  $H(u; s)$  from

$$\frac{E_{\psi(0)}\{g^{-1}[H(s + u; 0) + \psi_i(0)]\}}{E_{\psi(0)}\{g^{-1}[H(s; 0) + \psi_i(0)]\}} = E_{\psi(s)}[g^{-1}\{H(u; s) + \psi_i(s)\}], \quad (\text{A5})$$

provided that all the expectations involved in (A5) are finite.

Third, as we obtain  $H(u; s)$  and  $T_{is} = T_i - s$ , we define a variable transformation as  $W_i(s) = H(T_{is}; s)$ . It can be shown that the distribution of  $W_i(s)$  conditional on  $\psi_i(s)$  as  $f\{W_i(s)|\psi_i(s)\} = -\frac{\partial g^{-1}\{\psi_i(s) + W_i(s)\}}{\partial W_i(s)}$ , based on the distribution  $f\{T_{is}|\psi_i(s)\}$  given in model (A3). Then, the conditional distribution of  $\psi_i(s)$  given  $W_i(s)$  is derived by Bayes' formula

$$f\{\psi_i(s)|W_i(s)\} = \frac{f\{W_i(s)|\psi_i(s)\}f\{\psi_i(s)\}}{\int_{-\infty}^{\infty} f\{W_i(s)|\psi_i(s)\}f\{\psi_i(s)\}d\psi_i(s)}. \quad (\text{A6})$$

Next, we generate  $\psi_i(s)$  from the distribution given in (A6), which depends on  $T_{is}$ . This data-generating procedure is applicable to any transformation model. Specifically, we describe below about proportional hazards (PH) models and proportional odds models (PO) as examples.

### For A Proportional Hazards Model in Sections 3.1.

The data generation algorithm described above is numerical in general, except for landmark PH models. For a landmark PH model, parametric distribution of  $f\{\psi_i(s)|W_i(s)\}$  in (A6) can be found by using a Gamma conjugate prior. We consider a landmark Cox PH model for failure times conditional on one baseline variable and three time-dependent variables, i.e.,  $g(x) = \log\{-\log(x)\}$  and  $\mathbf{Z}_i(s) = (Z_1(s), Z_2, Z_3(s), Z_4(s))$ . Covariate coefficients are set to be  $\beta_1(s) = 0.1 + 0.2\sqrt{s}$ ,  $\beta_2(s) = -0.6 + 0.005s$ ,  $\beta_3(s) = 0.4 + 0.01s$ , and  $\beta_4(s) = -0.3$ .

We let  $\psi_i(s) = \exp\{\mathbf{Z}'_i(s)\boldsymbol{\beta}(s)\}$  and assume that the marginal distribution of  $\psi_i(s)$  is a Gamma distribution with shape parameter of  $\alpha(s) = 1 - 0.05\sqrt{s}$  and rate parameter of  $\eta(s) = 1.5 + 0.05s$  for any given  $s$ . In addition, we assume that the baseline cumulative hazard function  $\Lambda_0(u; 0) = (0.2u)^3$  (i.e., Weibull distribution) for failure times at  $s = 0$ . As a conjugate distribution, it can be shown that the distribution of  $\psi_i(s)$  conditional on  $T_{is}$  is also a Gamma distribution with parameters  $\alpha(s) + 1$  and  $\eta(s) + \Lambda_0\{T_i(s); s\}$ . The idea is to find the marginal distribution of  $T_i$  and generate failure times first, and then generate  $\psi_i(s)$  by a conditional distribution given  $T_{is}$ . To incorporate intra-subject correlation among the longitudinal measurements, the values of  $\psi_i(s)$  at different landmark times  $s$  are generated from a Gaussian copula with an exchangeable correlation structure, where the correlation coefficient is given by  $\rho = 0.3$ . Additionally, we let  $Z_{i2} \sim \text{Bernoulli}(p = 0.5)$  and  $Z_{i3}(s) \sim N(2Z_{i2} - 1, 1)$  with independent serial correlation. Finally, we assume that  $Z_{i4}(s) \sim N(0, 1)$  from a Gaussian copula with exchangeable serial correlation and set  $\rho = 0.3$  as well. Then,  $Z_{i1}$  is obtained by solving the equation  $\psi_i(s) = \exp\{\mathbf{Z}'_i(s)\boldsymbol{\beta}(s)\}$ .

### For A Proportional Odds Model in Sections 3.2.

For a proportional odds model, i.e.  $g(x) = \log\{(1 - x)/x\}$ . We let  $\psi_i(s) = \mathbf{Z}'_i(s)\boldsymbol{\beta}(s)$  and assume that  $\psi_i(s) \sim \text{Uniform}(-3, 3)$  for any  $s$ . We also define  $H(u; 0) = \log\{(1 - S_0(u))/S_0(u)\}$ , where  $S_0(u) = \exp\{-(0.12u)^3\}$  is the baseline survival function of a Weibull distribution. Failure time  $T_i$  is generated first and  $\psi_i(s)$  is simulated from its distribution conditional on  $T_{is}$ . Subsequently, we generate the trajectories,  $Z_{i2} \sim \text{Bernoulli}(0.5)$ ,  $Z_{i3}(s) \sim \text{Uniform}(-3 + Z_{i2}, 3 - Z_{i2})$ , and  $Z_{i4}(s) \sim \text{Uniform}(-3, 3)$ , and  $Z_{i1}(s)$  can be solved from

Table A1: Summary of the estimates of regression coefficients in the simulation for a landmark PH model. True value, bias, bias percentage (bias.perc), and mean squared error (MSE) are presented. Sample size of the training dataset is  $n = 200$ ; number of simulation replicates is 100.

| n=200     |   | proposed method |        |               |       | LVCF method |               |       |  |
|-----------|---|-----------------|--------|---------------|-------|-------------|---------------|-------|--|
| coef      | s | True            | bias   | bias.perc (%) | MSE   | bias        | bias.perc (%) | MSE   |  |
| $\beta_1$ | 2 | 0.383           | 0.019  | 4.908         | 0.003 | -0.095      | 24.792        | 0.011 |  |
| $\beta_2$ | 2 | -0.590          | -0.036 | 6.012         | 0.115 | 0.031       | 5.284         | 0.066 |  |
| $\beta_3$ | 2 | 0.420           | 0.029  | 7.009         | 0.018 | -0.030      | 7.091         | 0.013 |  |
| $\beta_4$ | 2 | -0.300          | 0.017  | 5.523         | 0.013 | 0.040       | 13.454        | 0.010 |  |
| $\beta_1$ | 4 | 0.500           | 0.032  | 6.330         | 0.006 | -0.071      | 14.230        | 0.008 |  |
| $\beta_2$ | 4 | -0.580          | -0.002 | 0.295         | 0.153 | 0.057       | 9.902         | 0.084 |  |
| $\beta_3$ | 4 | 0.440           | 0.032  | 7.327         | 0.017 | -0.030      | 6.891         | 0.014 |  |
| $\beta_4$ | 4 | -0.300          | -0.013 | 4.197         | 0.017 | 0.042       | 13.905        | 0.012 |  |
| $\beta_1$ | 6 | 0.590           | 0.046  | 7.748         | 0.013 | -0.063      | 10.596        | 0.014 |  |
| $\beta_2$ | 6 | -0.570          | 0.024  | 4.266         | 0.298 | 0.103       | 18.140        | 0.198 |  |
| $\beta_3$ | 6 | 0.460           | -0.003 | 0.602         | 0.031 | -0.045      | 9.839         | 0.037 |  |
| $\beta_4$ | 6 | -0.300          | -0.021 | 6.831         | 0.041 | 0.011       | 3.569         | 0.023 |  |

$\psi_i(s) = \mathbf{Z}'_i(s)\boldsymbol{\beta}(s)$ , where  $\boldsymbol{\beta}(s)$  is specified the same as before. We employ a Gaussian copula to incorporate serial correlations of  $\psi_i(s)$  and  $X_{i4}(s)$  with an exchangeable correlation structure and set the coefficient at  $\rho = 0.3$ .

As a result, trajectories of the time-varying biomarkers for 20 randomly selected individuals and the estimated Kaplan-Meier marginal survival curve based on a landmark PO model are plotted in Figure A1.

Table A2: Summary of the estimates of regression coefficients in the simulation for a landmark PH model. True value, bias, bias percentage (bias.perc), and mean squared error (MSE) are presented. Sample size of the training dataset is  $n = 500$ ; number of simulation replicates is 100.

| n=500     |   | proposed method |        |               |       | LVCF method |               |       |  |
|-----------|---|-----------------|--------|---------------|-------|-------------|---------------|-------|--|
| coef      | s | True            | bias   | bias.perc (%) | MSE   | bias        | bias.perc (%) | MSE   |  |
| $\beta_1$ | 2 | 0.383           | 0.015  | 3.826         | 0.002 | -0.111      | 28.947        | 0.013 |  |
| $\beta_2$ | 2 | -0.590          | -0.041 | 6.997         | 0.083 | 0.069       | 11.730        | 0.035 |  |
| $\beta_3$ | 2 | 0.420           | 0.018  | 4.156         | 0.008 | -0.060      | 14.369        | 0.007 |  |
| $\beta_4$ | 2 | -0.300          | -0.008 | 2.625         | 0.012 | 0.029       | 9.485         | 0.005 |  |
| $\beta_1$ | 4 | 0.500           | 0.017  | 3.448         | 0.003 | -0.082      | 16.315        | 0.008 |  |
| $\beta_2$ | 4 | -0.580          | -0.020 | 3.457         | 0.076 | 0.036       | 6.172         | 0.025 |  |
| $\beta_3$ | 4 | 0.440           | 0.017  | 3.901         | 0.011 | -0.036      | 8.148         | 0.006 |  |
| $\beta_4$ | 4 | -0.300          | 0.004  | 1.444         | 0.009 | 0.027       | 8.907         | 0.006 |  |
| $\beta_1$ | 6 | 0.590           | 0.026  | 4.400         | 0.007 | -0.078      | 13.222        | 0.010 |  |
| $\beta_2$ | 6 | -0.570          | 0.029  | 5.007         | 0.104 | 0.067       | 11.755        | 0.074 |  |
| $\beta_3$ | 6 | 0.460           | 0.020  | 4.246         | 0.014 | -0.039      | 8.536         | 0.010 |  |
| $\beta_4$ | 6 | -0.300          | -0.020 | 6.793         | 0.016 | 0.026       | 8.569         | 0.009 |  |

Table A3: Summary of the estimates of regression coefficients in the simulation for a landmark PO model. True value, bias, bias percentage, and mean squared error (MSE) are presented. Sample size of the training dataset is  $n = 200$ ; number of simulation replicates is 100.

| n=200     |   | proposed method |        |               |       | LVCF method |               |       |
|-----------|---|-----------------|--------|---------------|-------|-------------|---------------|-------|
| coef      | s | True            | bias   | bias.perc (%) | MSE   | bias        | bias.perc (%) | MSE   |
| $\beta_1$ | 2 | 0.383           | 0.020  | 5.164         | 0.004 | -0.123      | 32.204        | 0.017 |
| $\beta_2$ | 2 | -0.590          | 0.010  | 1.682         | 0.217 | 0.110       | 18.696        | 0.140 |
| $\beta_3$ | 2 | 0.420           | 0.025  | 6.005         | 0.027 | -0.073      | 17.346        | 0.024 |
| $\beta_4$ | 2 | -0.300          | -0.001 | 0.223         | 0.014 | 0.049       | 16.262        | 0.011 |
| $\beta_1$ | 4 | 0.500           | 0.011  | 2.121         | 0.007 | -0.123      | 24.625        | 0.020 |
| $\beta_2$ | 4 | -0.580          | -0.004 | 0.751         | 0.262 | 0.087       | 14.935        | 0.136 |
| $\beta_3$ | 4 | 0.440           | 0.007  | 1.678         | 0.022 | -0.079      | 17.982        | 0.023 |
| $\beta_4$ | 4 | -0.300          | -0.010 | 3.273         | 0.018 | 0.051       | 16.984        | 0.014 |
| $\beta_1$ | 6 | 0.590           | 0.025  | 4.281         | 0.014 | -0.113      | 19.094        | 0.019 |
| $\beta_2$ | 6 | -0.570          | -0.082 | 14.329        | 0.276 | 0.055       | 9.580         | 0.158 |
| $\beta_3$ | 6 | 0.460           | 0.004  | 0.935         | 0.034 | -0.072      | 15.652        | 0.030 |
| $\beta_4$ | 6 | -0.300          | -0.005 | 1.558         | 0.018 | 0.033       | 10.940        | 0.019 |

Table A4: Summary of the estimates of regression coefficients in the simulation for a landmark PO model. True value, bias, bias percentage, and mean squared error (MSE) are presented. Sample size of the training dataset is  $n = 500$ ; number of simulation replicates is 100.

| n=500     |   | proposed method |        |               |       | LVCF method |               |       |
|-----------|---|-----------------|--------|---------------|-------|-------------|---------------|-------|
| coef      | s | True            | bias   | bias.perc (%) | MSE   | bias        | bias.perc (%) | MSE   |
| $\beta_1$ | 2 | 0.383           | 0.010  | 2.480         | 0.003 | -0.133      | 34.834        | 0.019 |
| $\beta_2$ | 2 | -0.590          | -0.040 | 6.721         | 0.116 | 0.099       | 16.853        | 0.048 |
| $\beta_3$ | 2 | 0.420           | 0.018  | 4.216         | 0.013 | -0.087      | 20.751        | 0.014 |
| $\beta_4$ | 2 | -0.300          | -0.013 | 4.443         | 0.010 | 0.055       | 18.313        | 0.007 |
| $\beta_1$ | 4 | 0.500           | 0.009  | 1.741         | 0.003 | -0.119      | 23.844        | 0.017 |
| $\beta_2$ | 4 | -0.580          | -0.022 | 3.824         | 0.093 | 0.081       | 13.970        | 0.050 |
| $\beta_3$ | 4 | 0.440           | -0.013 | 2.991         | 0.011 | -0.070      | 15.875        | 0.011 |
| $\beta_4$ | 4 | -0.300          | -0.010 | 3.342         | 0.012 | 0.051       | 17.102        | 0.007 |
| $\beta_1$ | 6 | 0.590           | 0.006  | 0.971         | 0.007 | -0.097      | 16.516        | 0.013 |
| $\beta_2$ | 6 | -0.570          | -0.023 | 4.104         | 0.116 | 0.053       | 9.214         | 0.070 |
| $\beta_3$ | 6 | 0.460           | 0.005  | 1.078         | 0.014 | -0.038      | 8.260         | 0.012 |
| $\beta_4$ | 6 | -0.300          | 0.008  | 2.490         | 0.010 | 0.046       | 15.356        | 0.010 |

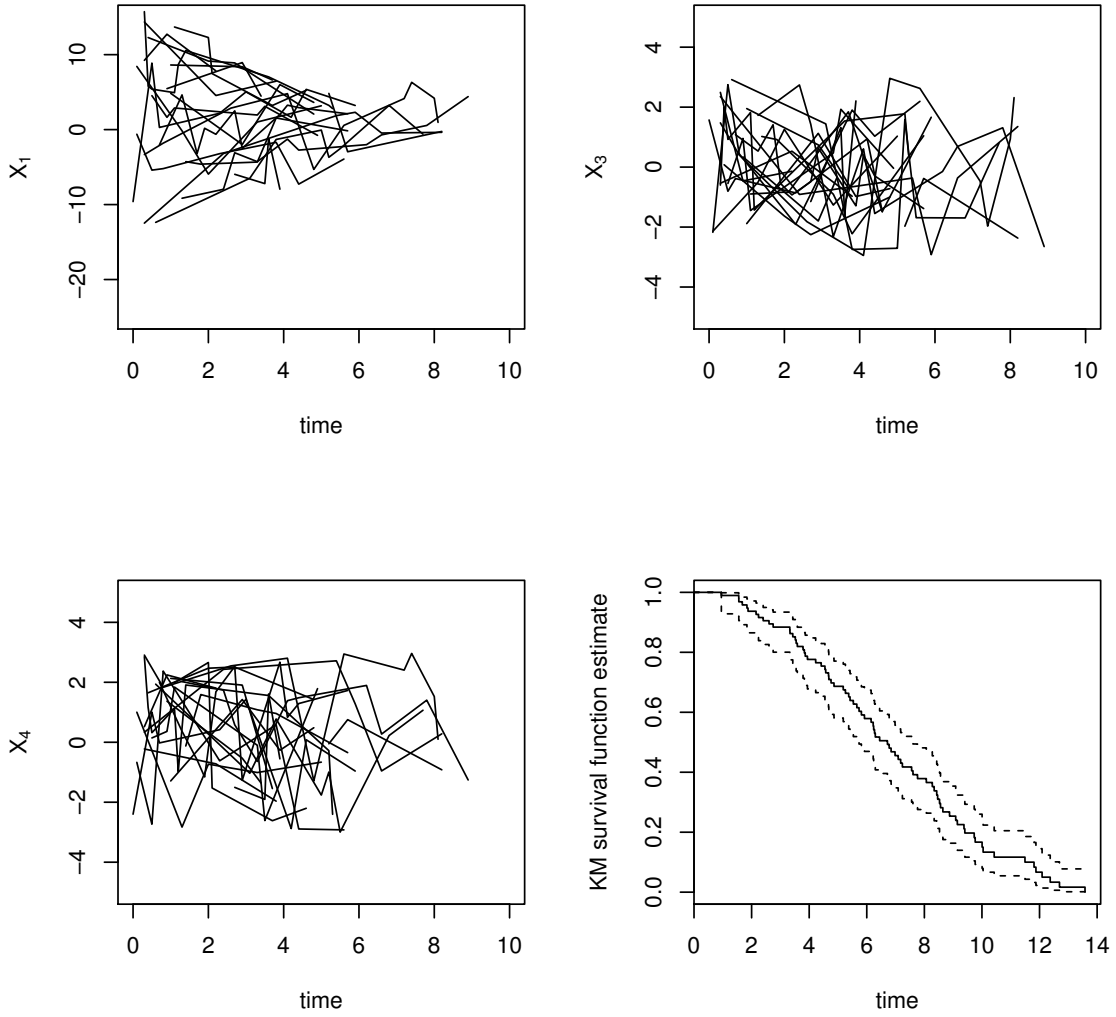

Figure A1: Trajectories of  $X_1(t)$ ,  $X_3(t)$ , and  $X_4(t)$  for 20 randomly selected subjects and the Kaplan-Meier (KM) estimate of the marginal survival curve for the whole sample of training data based on a landmark PO model from one simulation.



## Appendix C. Additional Simulation Results in Sections 3.1 & 3.2.

### References

Chen, K., Jin, Z. and Ying, Z. (2002) Semiparametric analysis of transformation models with censored data. *Biometrika*, **89**, 659–668.
